# Supplementary material for: Natural genetic variation of the cardiac transcriptome in non-diseased donors and patients with dilated cardiomyopathy
Source: PubMed Central journal article supplement (PMC5598015; doi:10.1186/s13059-017-1286-z), 2017-09-14
Supplement: 13059_2017_1286_MOESM1_ESM.pdf [file 13059_2017_1286_MOESM1_ESM.pdf]

# SUPPLEMENTAL MATERIAL

## Supplemental Notes

### Comparison to the GTEx study

Here we provide a summary of the comparisons to the GTEx study in a compact way.

#### *eQTL detected from combined population*

We systematically compared our results to eQTL from left-ventricular tissue of the GTEx project [7], which comprises 190 samples in version 6. For the comparison on the SNP level, we selected the most significant marker for each gene with cis eQTL in our study (nominal  $P < 1e-5$ ). Among the top SNPs, 82% were also analyzed in the GTEx study. Of these, 97% had concordant allelic effects (Supplemental Figure 3) although only 40% reached the significance threshold in GTEx. The larger number of eQTL detected in our study is most likely due to reduced statistical power caused by a slightly smaller sample size or the use of post-mortem tissues in the GTEx project. Using Storey's q-value method [34], we estimated that 93% of eQTL are actually shared. Conversely, we have analyzed 18% of the top GTEx SNPs for genes with cis eQTL, of which 72% were significant in our study, 97% had concordant allelic effects and 92% were estimated to be shared.

#### *eQTL detected from individual populations*

Given the presence of DCM specific eQTLs we also performed comparisons between the GTEx results and eQTL results obtained using the non-diseased donor samples and the DCM patients separately. The concordance of the direction of the genotype effect was between 96 – 98% in all comparisons (Supplemental Figures 5-6, Supplemental Table 8). The fraction of shared significant eQTLs detected in the donor samples was slightly higher (60%) compared to the DCM samples (55%). Using the GTEx eQTLs as basis for the comparison, we found 43% shared eQTLs in the donor samples and 47% shared eQTLs in the DCM samples. These numbers are lower than in the comparison of GTEx eQTLs to the results of the full study, where 72% were shared, most likely due to the reduced sample size in the separate analyses.

#### *trQTL*

In our study, we have identified 2,874 trQTL (14.6% of tested gene). In comparison to the GTEx study (242 trQTL, ~1.2% of tested genes), we identified over 10 times as many trQTL. To investigate the possible factors leading to this increase in detection rate, we matched our data set to the GTEx data set in terms of read depth, sample size and size of the *cis* window (see Methods). In this matched analysis we estimated that 1.5 % of genes have trQTL (Table 2), which is in accordance with GTEx.

#### *Annotation of GWA hits*

Overall we have identified eQTL (nominal  $P < 1.0e-05$ ) at 60 of the 298 heart GWA loci, which represents a highly significant enrichment (OR = 3.4,  $P < 2.2e-10$ , FET) of eQTL for GWA variants. In the GTEx data, 39 GWA SNPs were significant eQTL of which 24 were also identified in our study. When also considering lowly expressed genes, the numbers of GWA SNPs with eQTL in our study increased to 70 (OR = 3.1,  $P = 2.2e-16$ , FET) and 45 in GTEx.

## Supplementary Figures

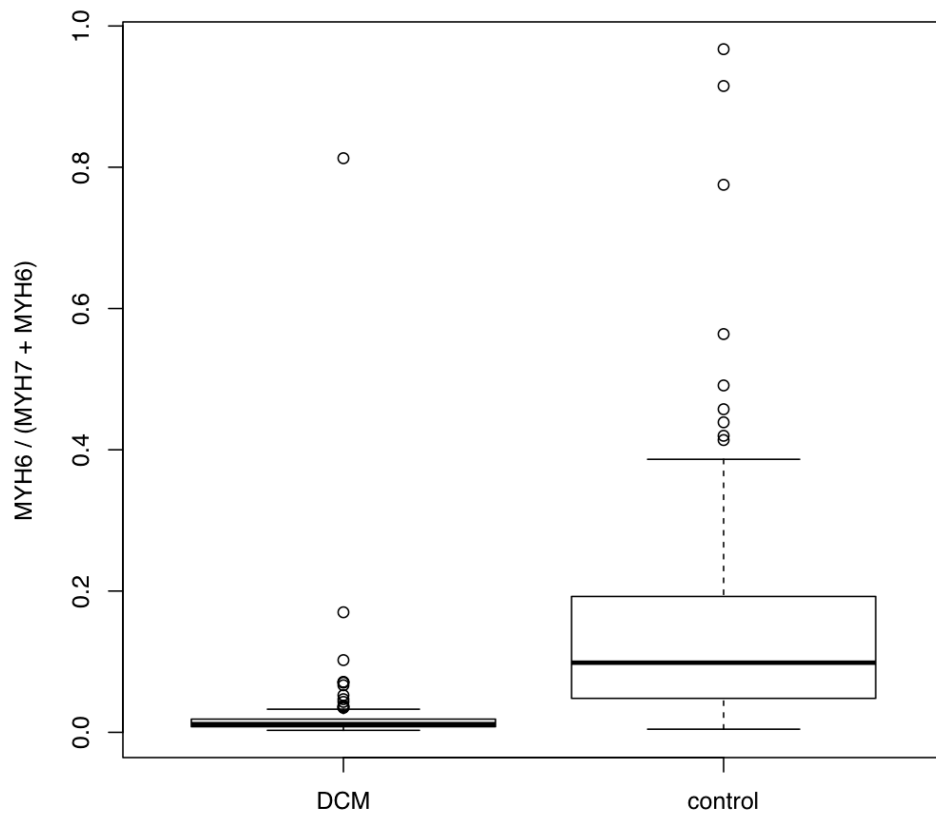

**Supplemental Figure 1:** *Differential expression between DCM patients and controls at the myosin heavy chain locus.* Boxplots show the abundance of MYH6 transcripts relative to all MYH6 and MYH7 transcripts in DCM patients and healthy controls.

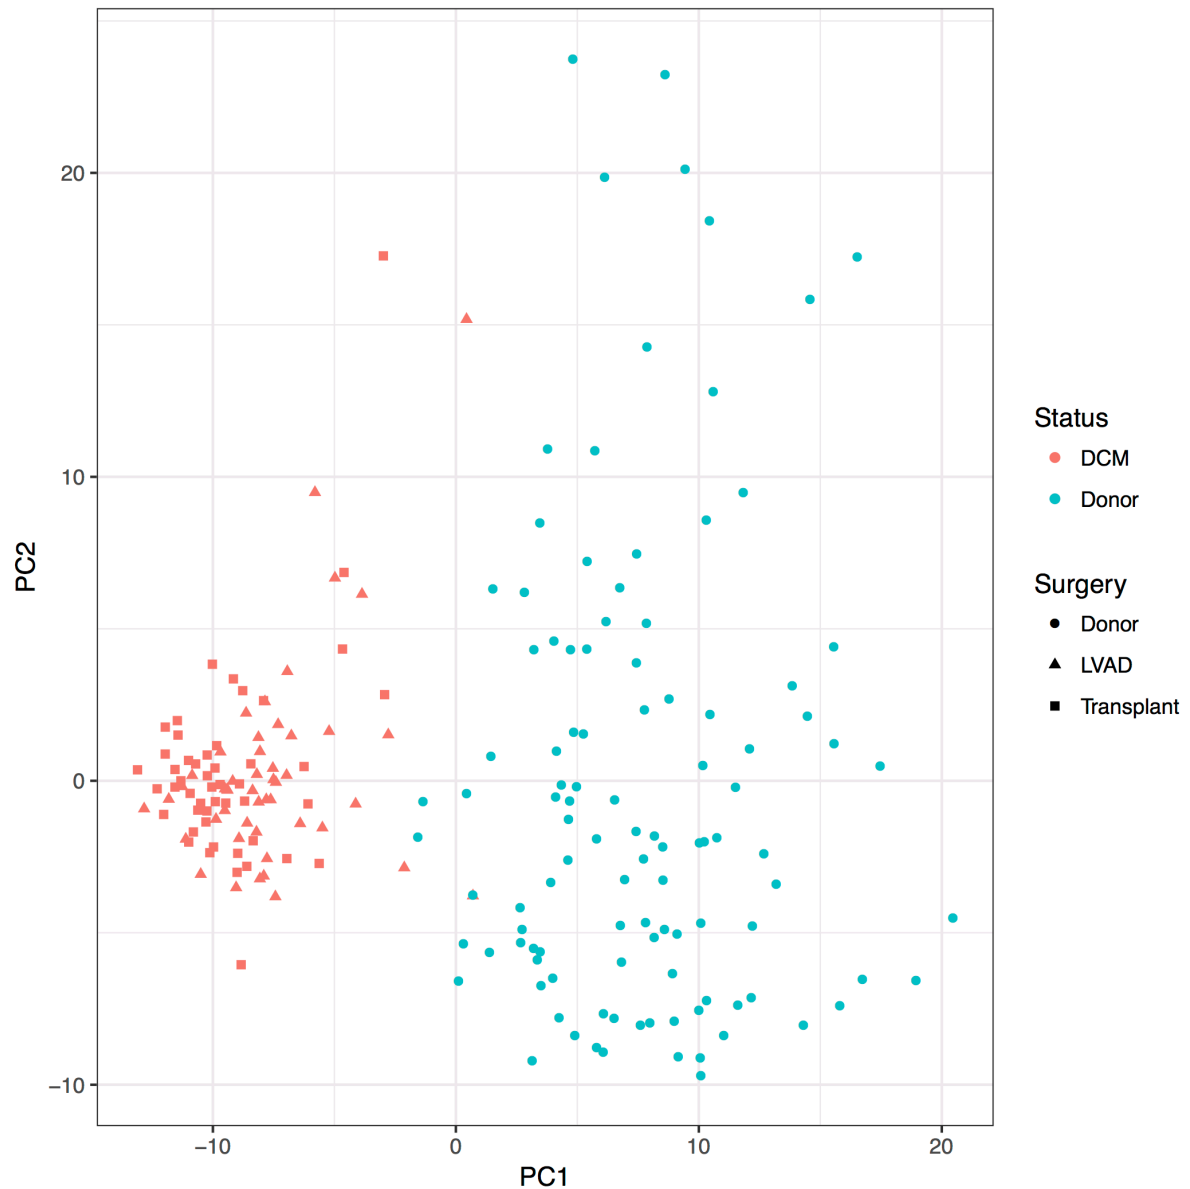

**Supplemental Figure 2:** *Principal components analysis of DCM patients and donor samples.* The scatter plot shows the projection of the expression data on the first (x-axis) and second (y-axis) principal components. Color encoding shows the status (DCM or Donor) and the shape of the symbol indicates the type of surgery that was performed on the DCM patients.

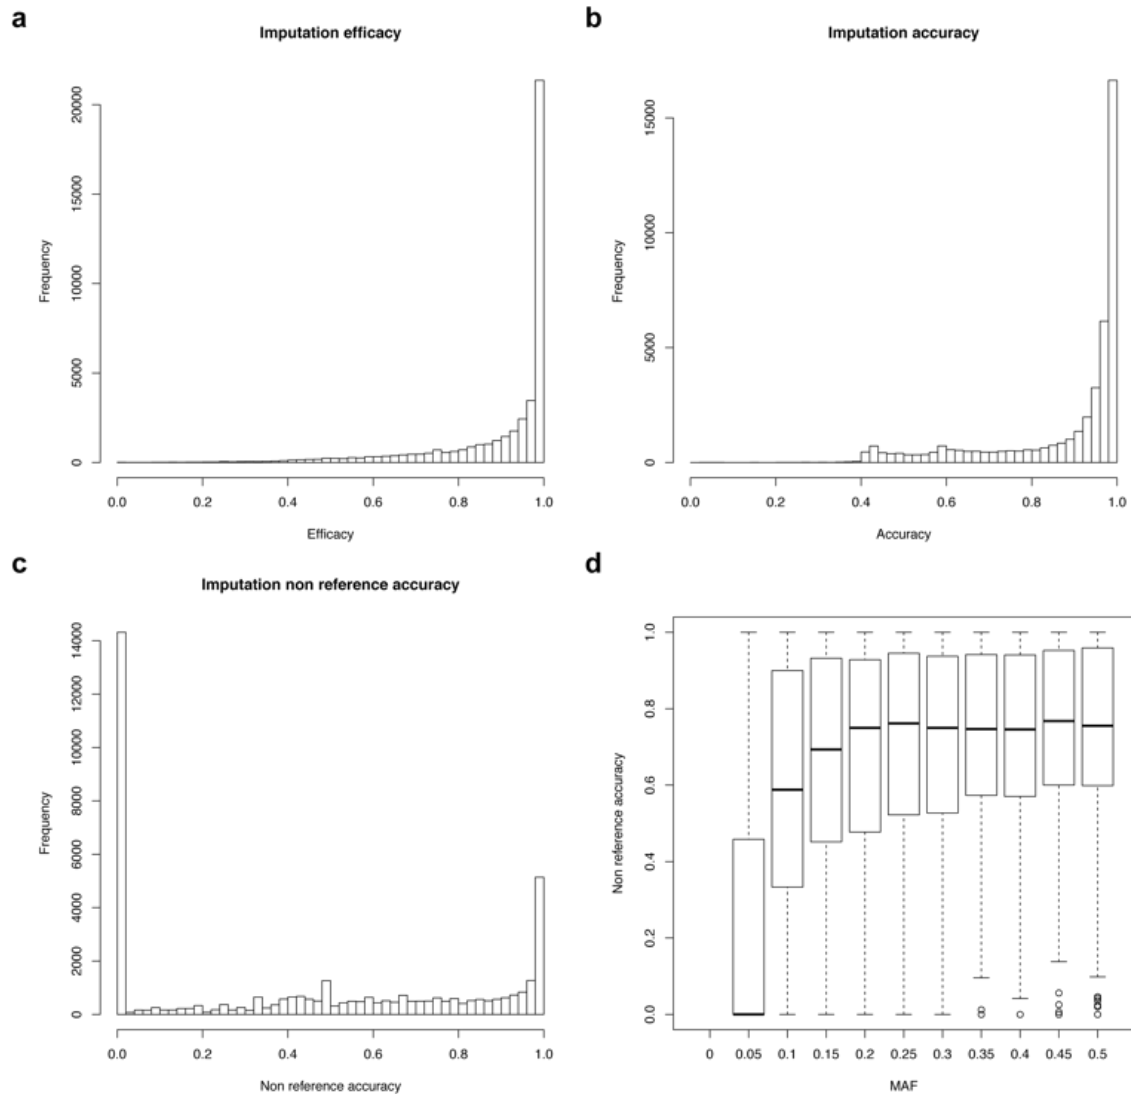

**Supplemental Figure 3: Assessment of genotype imputation quality.** We have used RNA-seq reads at common variant positions in exons with high coverage and not in allelic imbalance to derive a high confidence set for the evaluation of imputation quality. We measured **a)** imputation efficacy as the fraction of confidently imputed samples per SNP, **b)** accuracy as the fraction of correct genotype calls per SNP, **c)** non reference accuracy as the fraction of correct non reference genotype calls per SNP. The boxplot in **d)** shows the non reference accuracy for different minor allele frequency (MAF) bins of width 0.05.

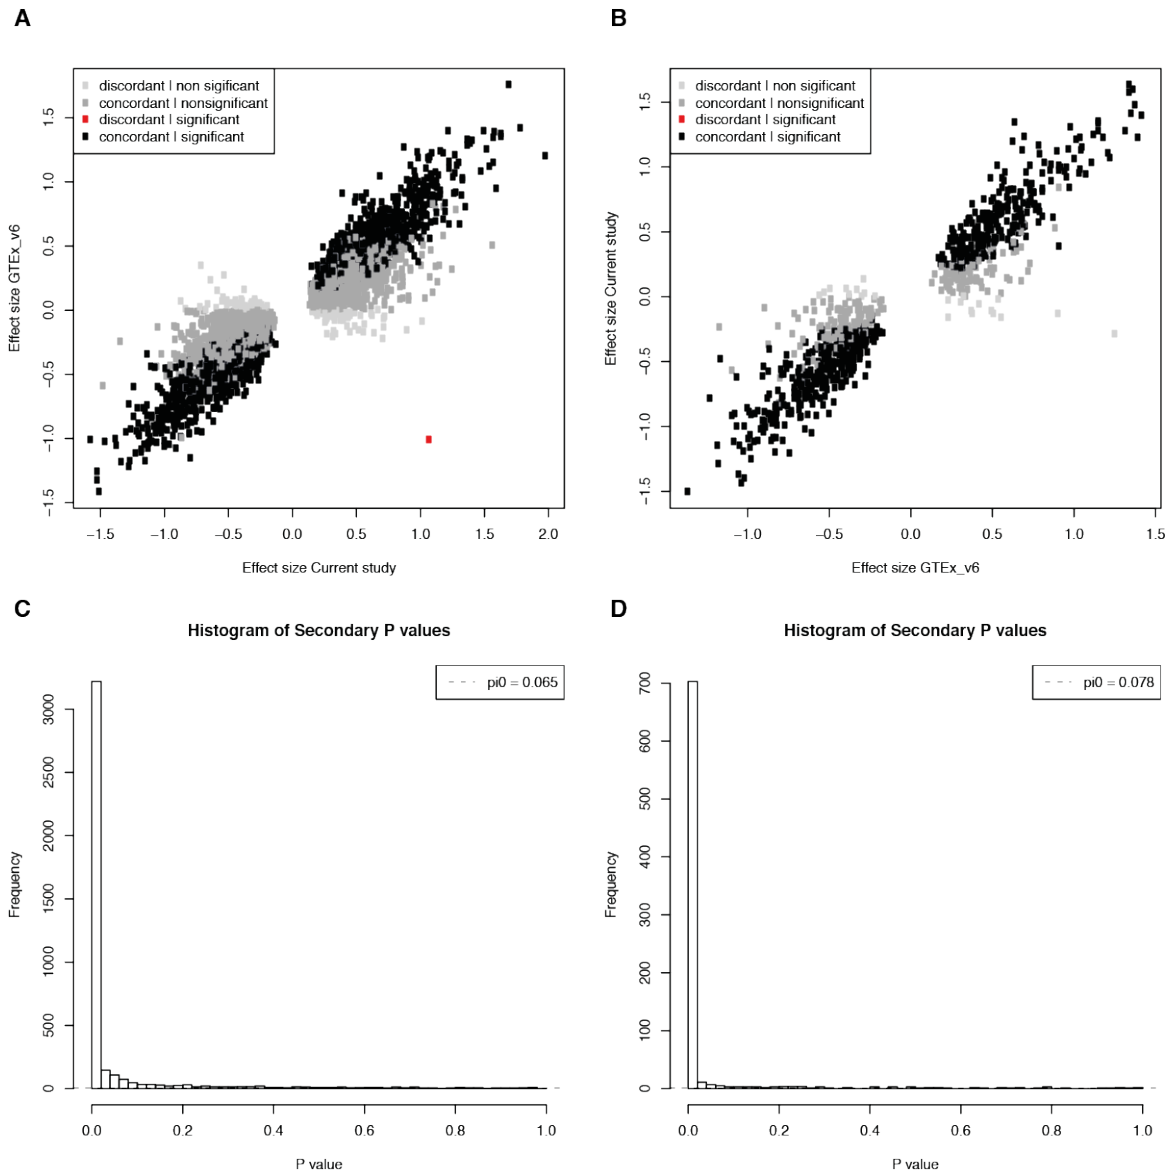

**Supplemental Figure 4: Comparison of eQTL results with GTEx.** We obtained P-values and effect size estimates from the GTEx eQTL results for significant eQTLs ( $P < 1e-5$ ) of the current study that were also analysed in GTEx **a-b**) and vice versa **c, d**). Scatterplots **a, c**) show the effect size estimates. Histograms show the distributions of eQTL P-values **b, d**) and estimates  $\pi_0$  of the proportion of true null hypothesis estimated by the q-value method.

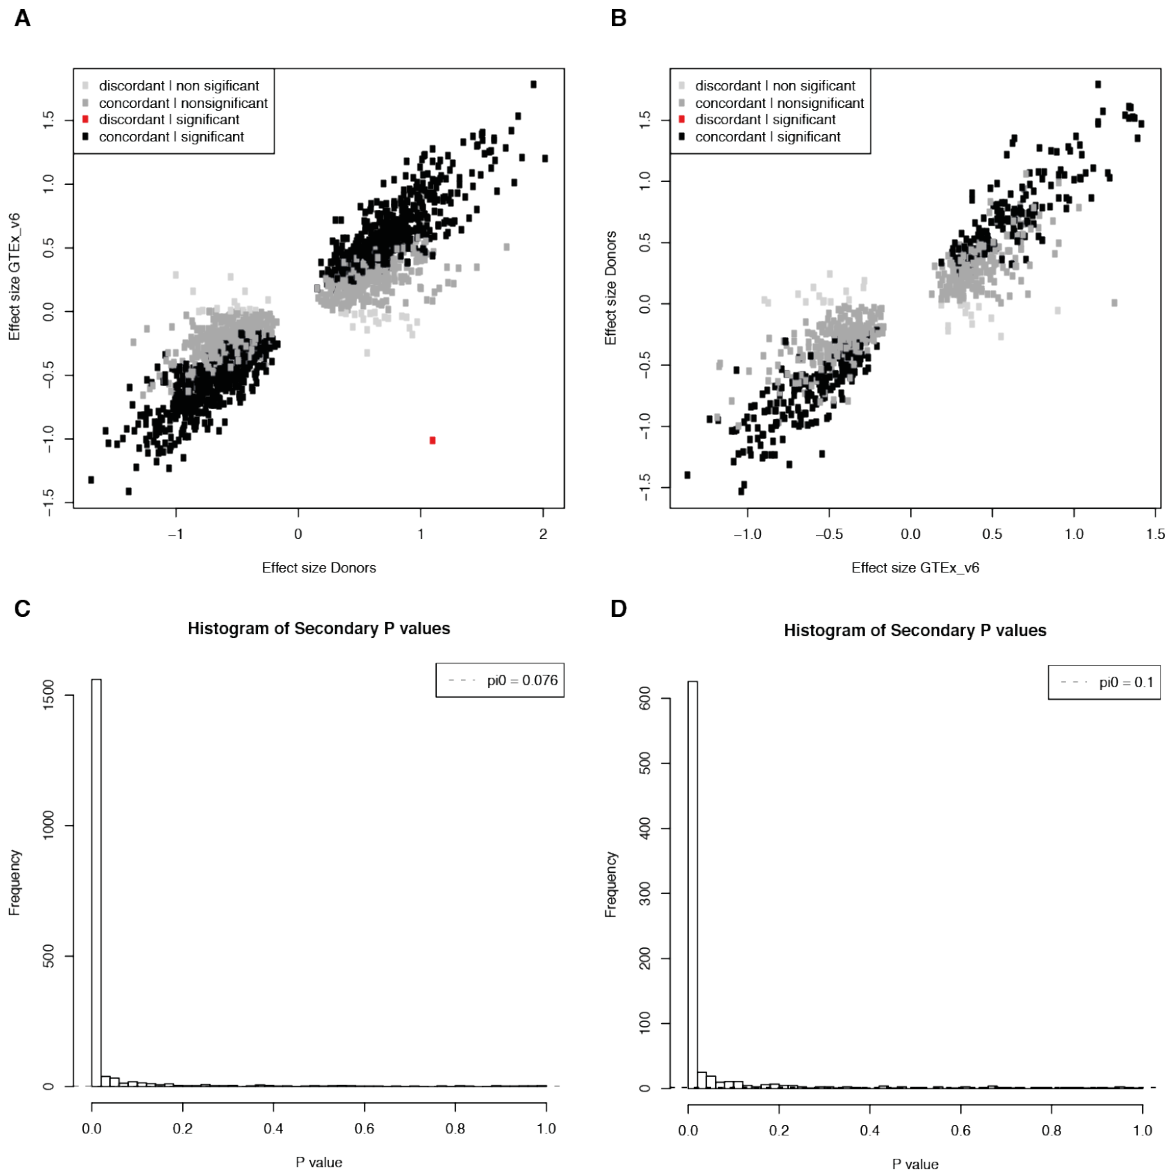

**Supplemental Figure 5:** Comparison of eQTL results obtained from donor samples only with GTEx. We obtained P-values and effect size estimates from the GTEx eQTL results for significant eQTLs ( $P < 1e-5$ ) of the current study that were also analysed in GTEx **a-b)** and vice versa **c, d)**. Scatterplots **a, c)** show the effect size estimates. Histograms show the distributions of eQTL P-values **b, d)** and estimates  $\pi_0$  of the proportion of true null hypothesis estimated by the q-value method.

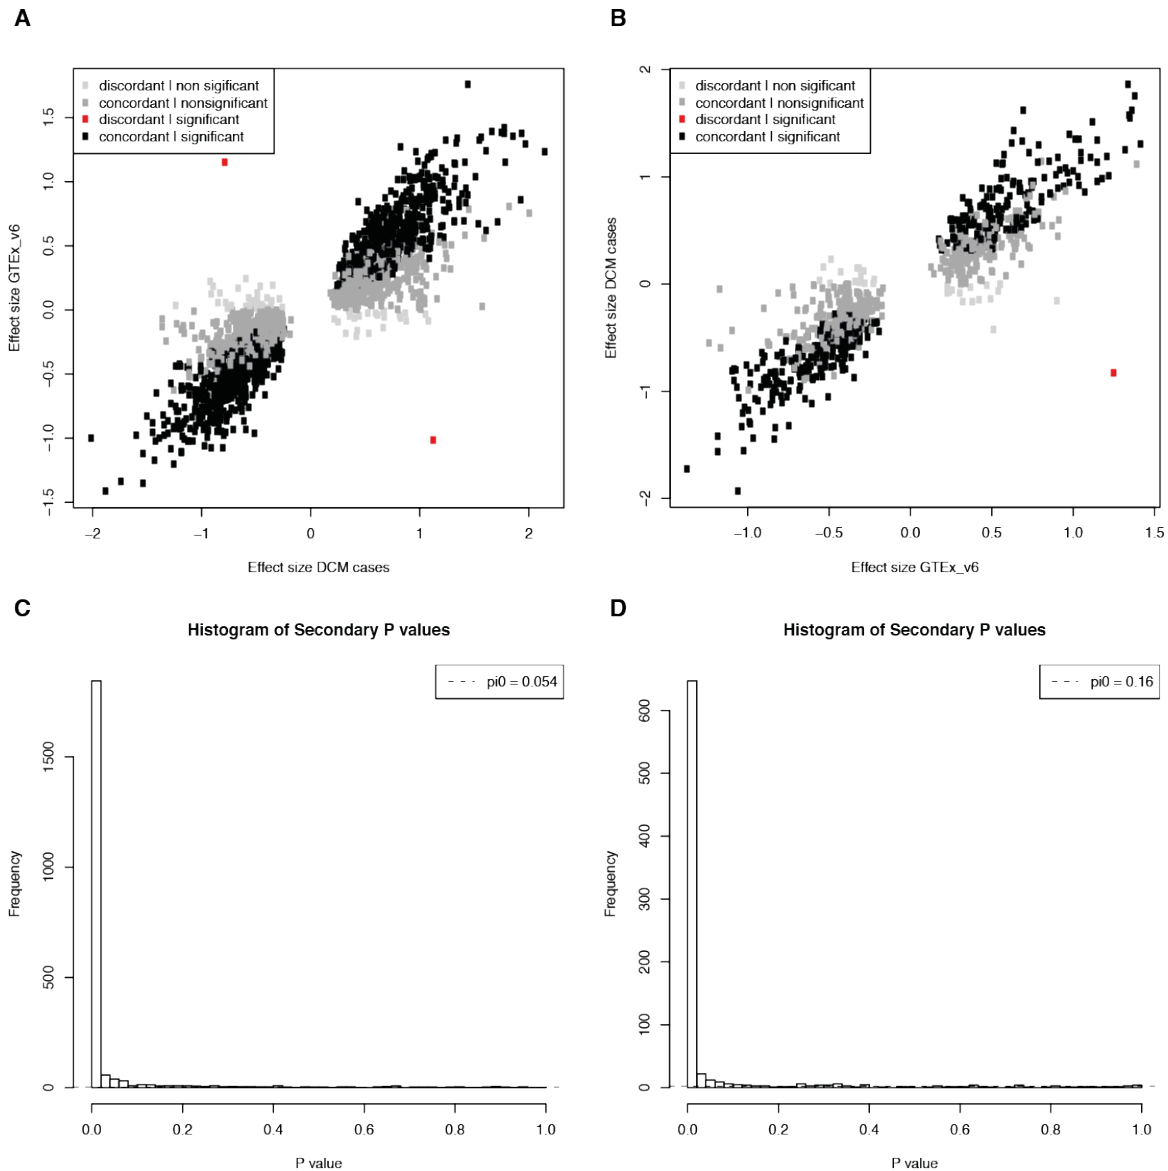

**Supplemental Figure 6:** Comparison of eQTL results obtained from DCM patients only with GTEx. We obtained P-values and effect size estimates from the GTEx eQTL results for significant eQTLs ( $P < 1e-5$ ) of the current study that were also analysed in GTEx **a-b)** and vice versa **c, d)**. Scatterplots **a, c)** show the effect size estimates. Histograms show the distributions of eQTL P-values **b, d)** and estimates  $\pi_0$  of the proportion of true null hypothesis estimated by the q-value method.



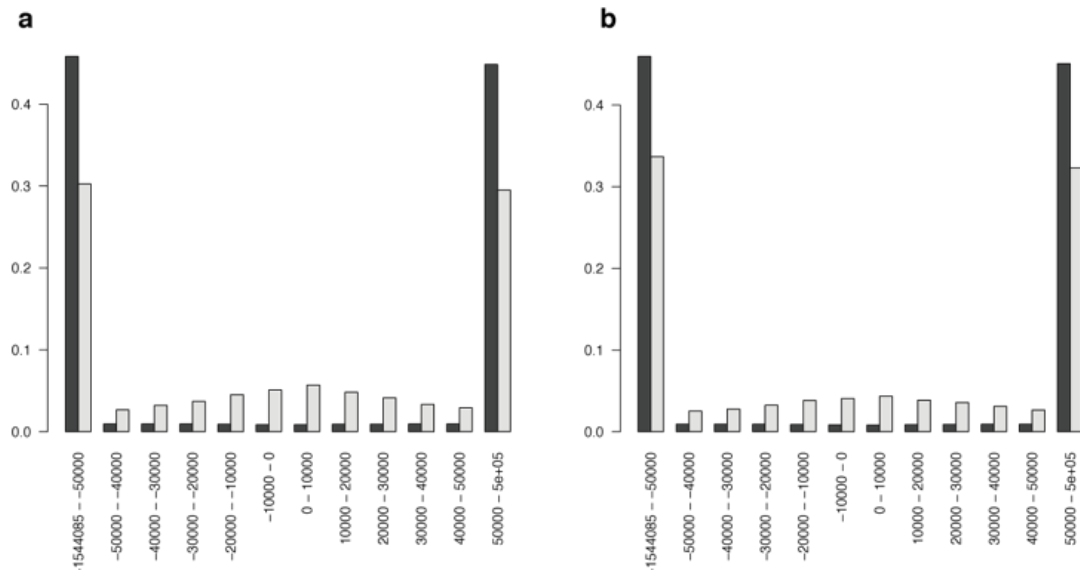

**Supplemental Figure 7: Distance of QTL SNPs to target genes and exons.**

Histograms show the distribution of SNPs with QTL (light grey) and without QTL (dark grey) for **a**) sQTLs and **b**) eQTLs.

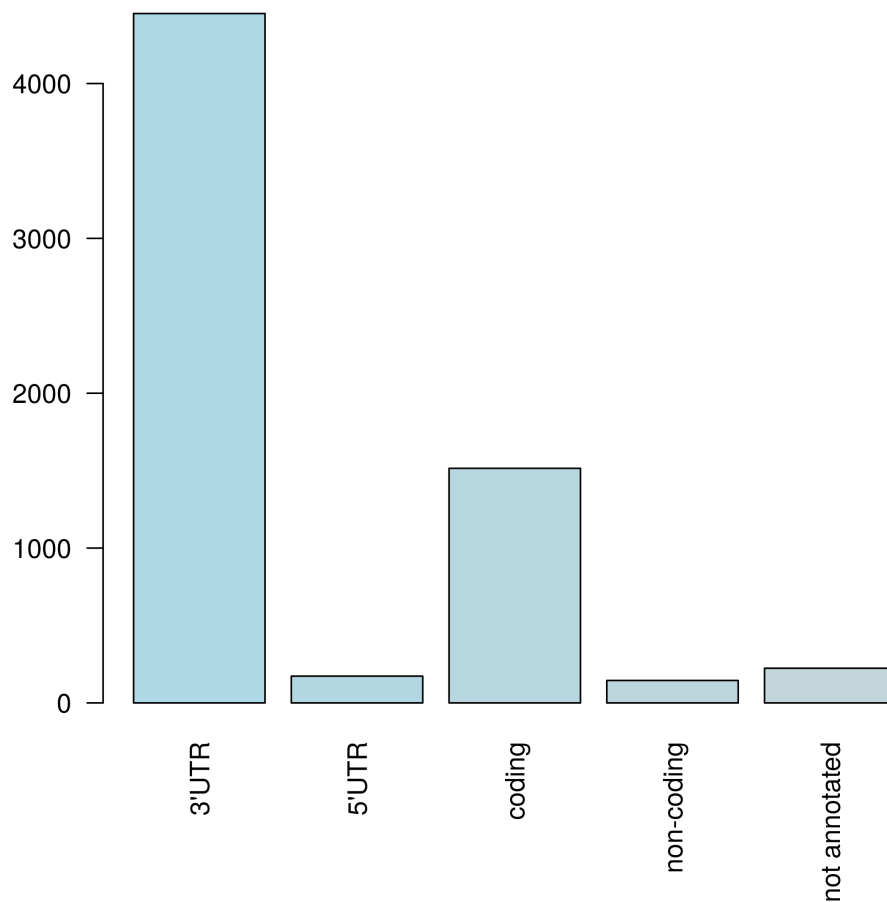

**Supplemental Figure 8:** *Functional annotation of all SNPs used in the ASE analysis.* All 6509 SNPs that are heterozygous in at least one individual and detected at high quality on both the genotyping microarray and in the RNA-seq variant calling were classified based on their relative location in their respective gene. There is a clear bias towards 3'UTR, likely caused by increased sequencing depth due to poly A selection for the RNA-seq analysis. Legend: 3'UTR = 3' untranslated region, 5'UTR = 5' untranslated region, coding = protein-coding exon, non-coding = non-protein-coding region (lncRNA, miRNA, pseudogenes), not annotated = no gene annotation available, i.e. unknown gene region.

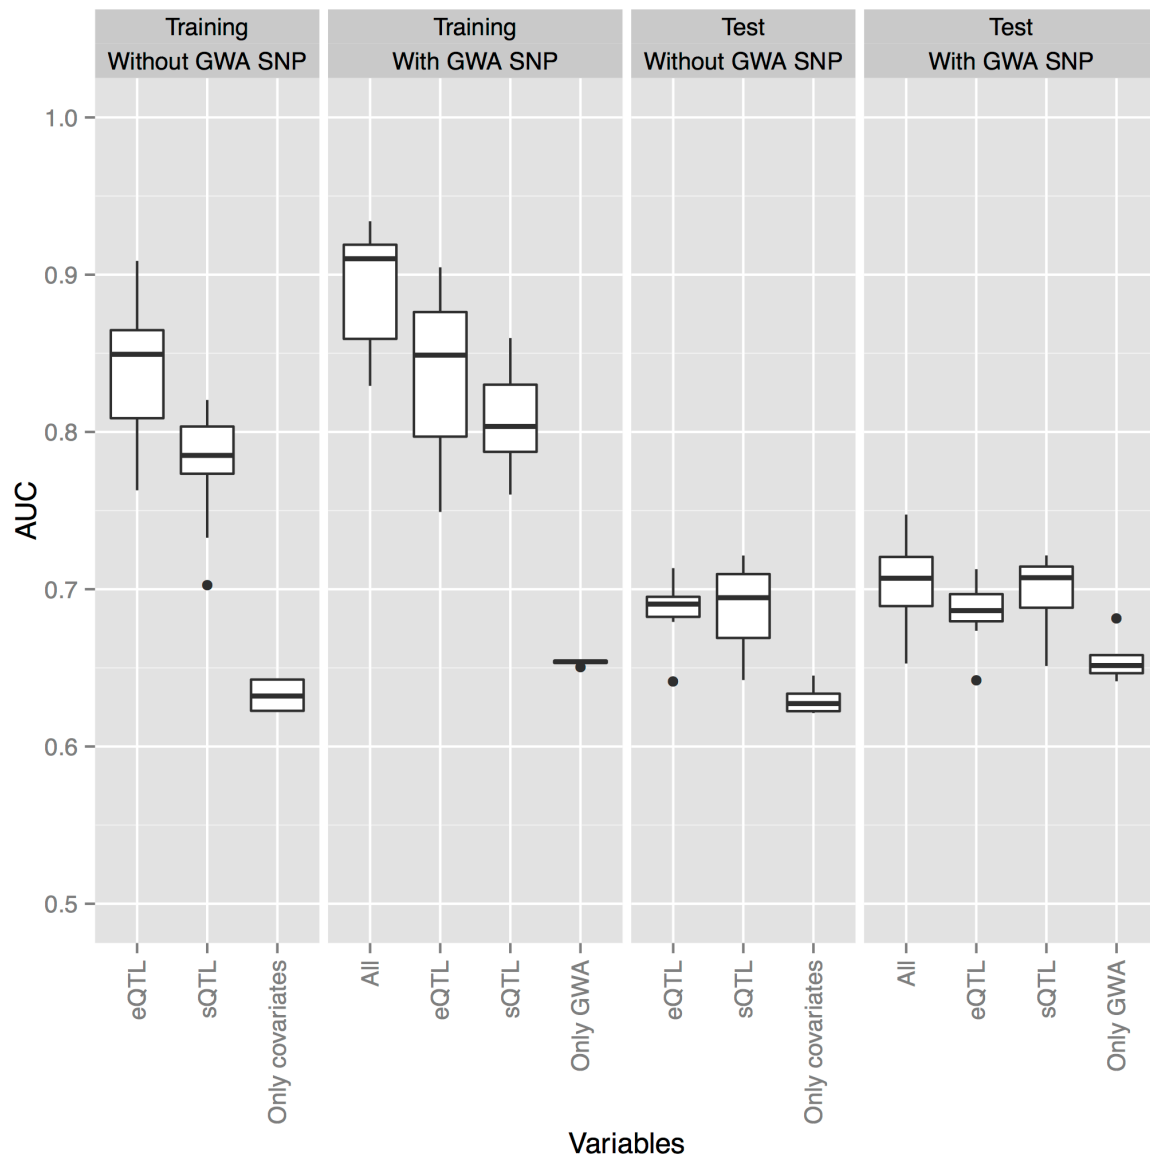

**Supplemental Figure 9: Evaluation of a multilocus DCM risk score.** The x-axis shows the different sets of candidate variables used for model training (eQTL: all SNPs with eQTL ( $P < 1e-5$ ), sQTL: all SNPs with sQTL ( $FDR < 0.05$ ), GWA: rs9262636). All sets contain the covariates age and sex. The y-axis shows the area under the receiver operator characteristics curve (AUC). Boxplots indicate the distribution of AUC values over the ten cross validation runs.

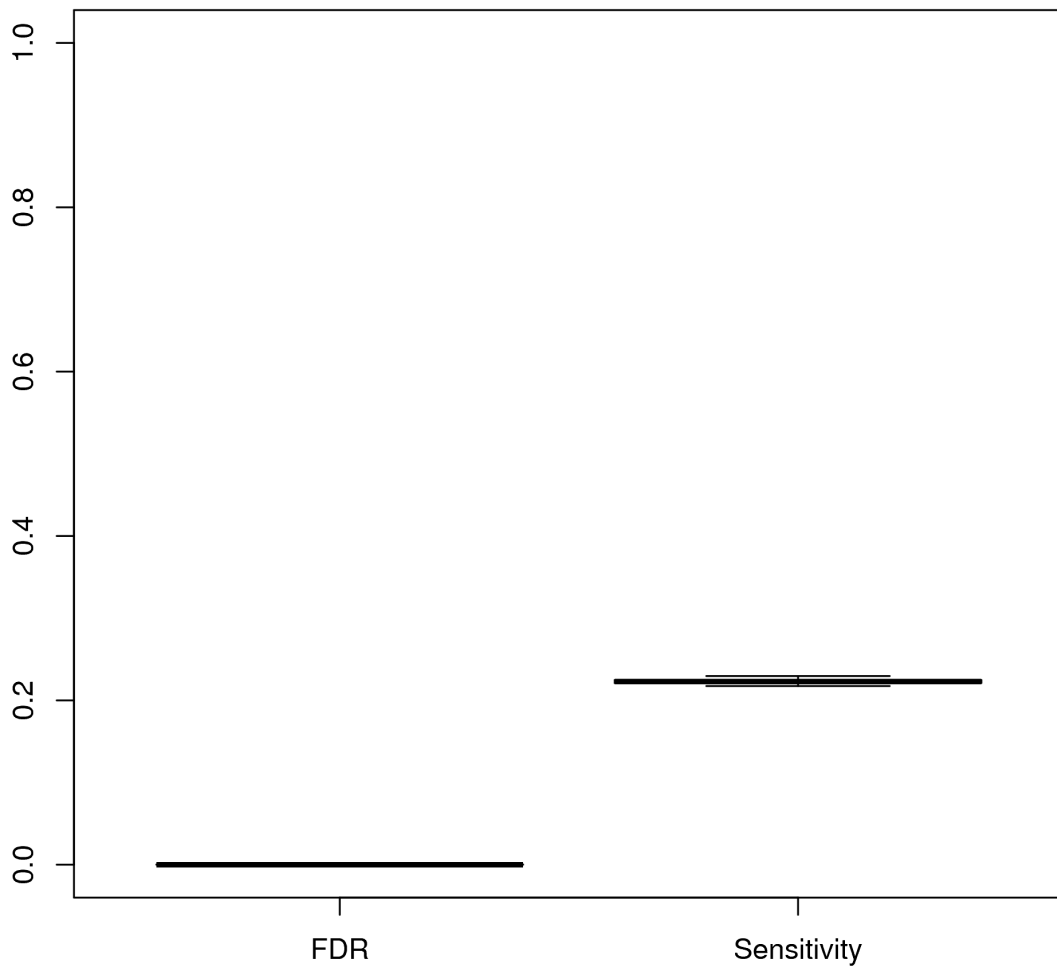

**Supplemental Figure 10:** *Evaluation of differential splicing detection by simulations.* The boxplots show the distribution of performance measures in 100 repeated simulation runs. The predictions were compared to the simulated differential exons to compute the sensitivity ( $TP / (FN + TP)$ ) and false discovery rate ( $FP / (FP + TP)$ ).

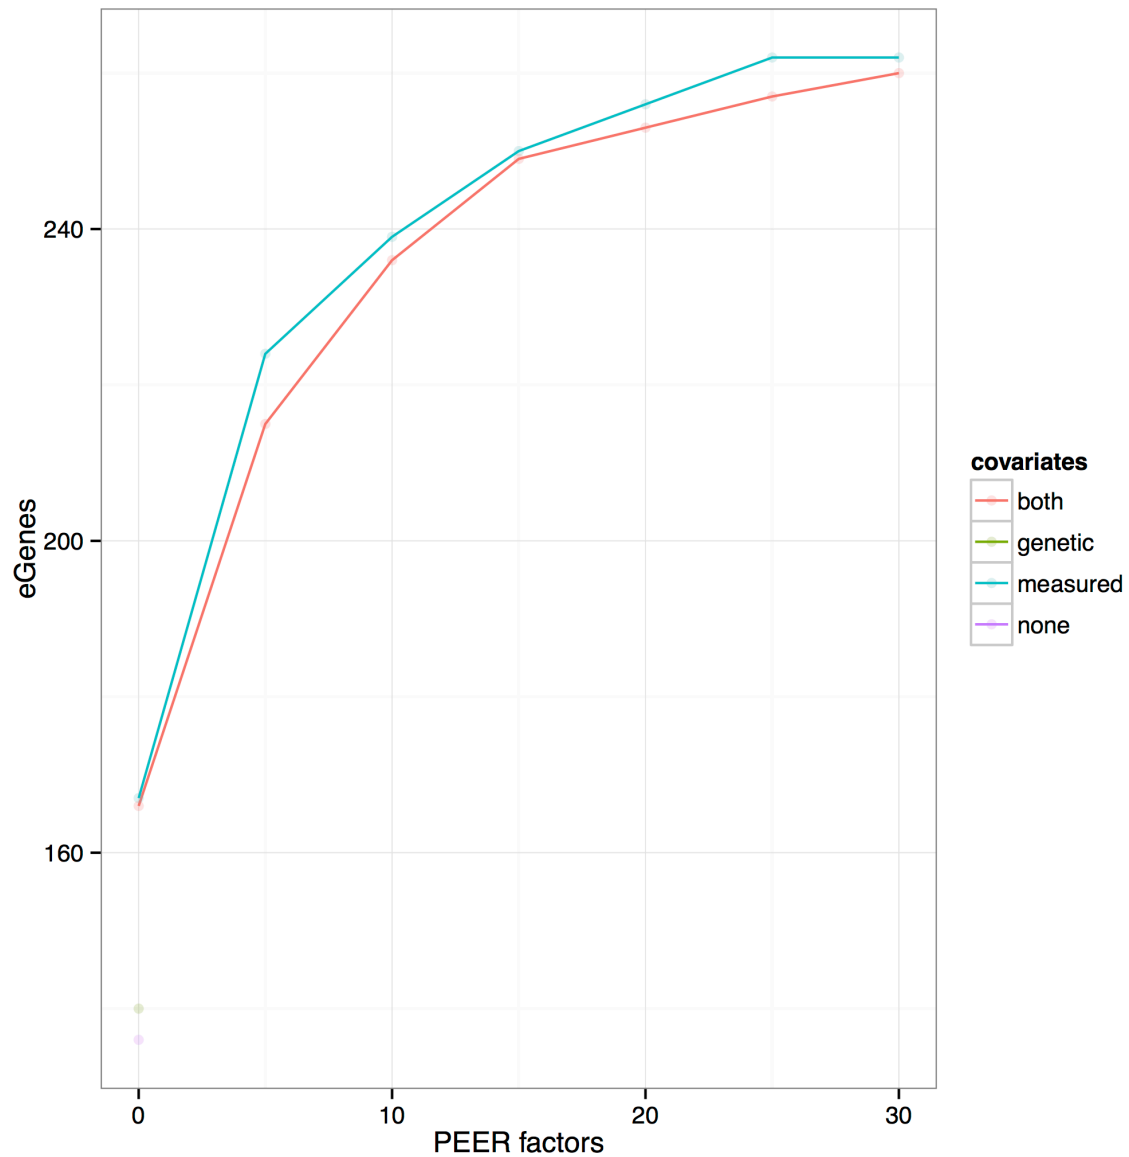

**Supplemental Figure 11:** *Effect of confounding factors on the detection of cis eQTLs.* The number of genes with significant *cis* eQTLs (eGenes) on chromosome 20 is shown for different combinations of covariates with inferred PEER factors. Covariates in the model are: none (purple), measured clinical covariates (cyan), the first 3 principle components of the genotype data (green) or both clinical and genetic covariates (red).

## Supplemental Tables

**Supplemental Table 1:** *Sample selection based on quality control criteria.* For details on the selection criteria see Methods.

|                         | DCM | Donors |
|-------------------------|-----|--------|
| Initial population      | 128 | 129    |
| Low RNA quality removed | 0   | 21     |
| Non-Europeans removed   | 31  | 0      |
| Used for analysis       | 97  | 108    |

**Supplemental Table 2:** *Summary of the two study populations.* Summary of clinical covariates sex and age by study center.

| Status  | Site      | N   | Female | Male | Avg. age | sd(age) |
|---------|-----------|-----|--------|------|----------|---------|
| control | Australia | 20  | 10     | 10   | 32.2     | 11.6    |
|         | Hungary   | 49  | 21     | 28   | 45.6     | 11.9    |
|         | Miami     | 4   | 1      | 3    | 53.5     | 28.9    |
|         | Nashville | 35  | 13     | 22   | 38.5     | 15.5    |
|         | $\Sigma$  | 108 | 45     | 63   | 41.1     | 14.8    |
| DCM     | London    | 97  | 15     | 82   | 42.3     | 12.8    |

**Supplemental Table 3:** *Summary clinical parameters of the DCM patients.*

|                               |         |
|-------------------------------|---------|
| <b>No of patients</b>         | 97      |
| <b>Reason for surgery, No</b> |         |
| Transplant                    | 49      |
| LVAD implantation             | 48      |
| <b>Family history, No</b>     | 9       |
| <b>Age, mean (SD)</b>         |         |
| At diagnosis                  | 39 (13) |
| At surgery                    | 42 (13) |
| <b>LVEF, %, mean (SD)</b>     | 22 (9)  |
| <b>FS, %, mean (SD)</b>       | 10 (4)  |
| <b>LVEDD, mm, mean (SD)</b>   | 70 (12) |

**Supplemental Table 4: Summary statistics of the RNA-seq data set.**

| <b>(in Mio. reads)</b>             | <b>Group</b> | <b>Min.</b> | <b>1st Qu.</b> | <b>Median</b> | <b>Mean</b> | <b>3rd Qu.</b> | <b>Max.</b> |
|------------------------------------|--------------|-------------|----------------|---------------|-------------|----------------|-------------|
| <b>Mapped</b>                      | Donor        | 106.8       | 168.2          | 183.2         | 184         | 202.3          | 231.9       |
|                                    | DCM          | 90.5        | 163.3          | 174.9         | 172.7       | 187.9          | 246         |
| <b>Paired in sequencing</b>        | Donor        | 106.8       | 168.2          | 183.2         | 184         | 202.3          | 231.9       |
|                                    | DCM          | 90.5        | 163.3          | 174.9         | 172.7       | 187.9          | 246         |
| <b>read1</b>                       | Donor        | 53.67       | 83.39          | 90.56         | 91.39       | 101.5          | 117.4       |
|                                    | DCM          | 50.69       | 82.01          | 88.1          | 87.35       | 94.34          | 123.4       |
| <b>read2</b>                       | Donor        | 53.14       | 83.95          | 93.3          | 92.58       | 101.6          | 114.5       |
|                                    | DCM          | 39.81       | 80.62          | 85.83         | 85.37       | 93.07          | 122.6       |
| <b>Properly paired</b>             | Donor        | 90.65       | 134.8          | 145.8         | 147.9       | 163.2          | 193.8       |
|                                    | DCM          | 64.49       | 131.3          | 140.3         | 137.6       | 150.9          | 188.4       |
| <b>With itself and mate mapped</b> | Donor        | 104         | 156            | 169.7         | 172         | 191.8          | 222.7       |
|                                    | DCM          | 77.28       | 155.7          | 166.1         | 165.2       | 180.8          | 236.3       |
| <b>Singletons</b>                  | Donor        | 2.779       | 6.551          | 8.606         | 11.99       | 18.8           | 26.71       |
|                                    | DCM          | 4.668       | 6.161          | 7.122         | 7.545       | 8.147          | 17.43       |
| <b>RIN score</b>                   | Donor        | 6.5         | 7.575          | 8.3           | 8.198       | 8.8            | 10          |
|                                    | DCM          | 6.3         | 7.3            | 7.6           | 7.586       | 7.9            | 8.7         |



**Supplemental Table 5: Characteristics of the RNA-seq data set.** Table shows for each sample: the total number of RNA-seq reads, mapped reads, paired reads, number of reads of each end of the paired end sequencing (read1, read2), number of reads that are properly paired after alignment, number of reads which also have their mate read mapped and the RNA integrity number (RIN score).

| Sample    | Total reads | Mapped reads | Paired reads | Read1     | Read2     | Properly paired | Read and mate read mapped | Singletons | RIN score |
|-----------|-------------|--------------|--------------|-----------|-----------|-----------------|---------------------------|------------|-----------|
| 20AH01746 | 157643232   | 157643232    | 157643232    | 80524426  | 77118806  | 126576560       | 148798216                 | 8845016    | 7.6       |
| 20AP01457 | 191791743   | 191791743    | 191791743    | 96307732  | 95484011  | 156865710       | 184669350                 | 7122393    | 8.1       |
| 20AR01418 | 167985357   | 167985357    | 167985357    | 84329710  | 83655647  | 133218948       | 161612052                 | 6373305    | 8.2       |
| 20BB01870 | 174868904   | 174868904    | 174868904    | 88320081  | 86548823  | 142934686       | 167789152                 | 7079752    | 7.7       |
| 20BM01499 | 167019581   | 167019581    | 167019581    | 83785172  | 83234409  | 136605728       | 161293470                 | 5726111    | 7.6       |
| 20CG01120 | 177016411   | 177016411    | 177016411    | 91183798  | 85832613  | 142948746       | 166126834                 | 10889577   | 6.3       |
| 20CH01353 | 178954910   | 178954910    | 178954910    | 89877108  | 89077802  | 146508630       | 171754344                 | 7200566    | 8.2       |
| 20CP01865 | 124199353   | 124199353    | 124199353    | 69198672  | 55000681  | 87276270        | 106767926                 | 17431427   | 7.6       |
| 20CS01710 | 168810789   | 168810789    | 168810789    | 84740297  | 84070492  | 135605806       | 162830740                 | 5980049    | 8.3       |
| 20CT01836 | 171079386   | 171079386    | 171079386    | 85748396  | 85330990  | 134472574       | 165210996                 | 5868390    | 8.2       |
| 20DB01398 | 168032170   | 168032170    | 168032170    | 85588474  | 82443696  | 135681056       | 158878652                 | 9153518    | 7.3       |
| 20DH01138 | 186326868   | 186326868    | 186326868    | 94005252  | 92321616  | 151220886       | 178965056                 | 7361812    | 8         |
| 20DH01701 | 197690440   | 197690440    | 197690440    | 99196462  | 98493978  | 160031592       | 191033456                 | 6656984    | 7.9       |
| 20DL01300 | 134654301   | 134654301    | 134654301    | 68779989  | 65874312  | 105331792       | 127279848                 | 7374453    | 7.1       |
| 20DS01225 | 195578792   | 195578792    | 195578792    | 98761762  | 96817030  | 155880548       | 188000226                 | 7578566    | 7.6       |
| 20DW01830 | 179267544   | 179267544    | 179267544    | 89805661  | 89461883  | 143759784       | 173281668                 | 5985876    | 8.1       |
| 20EC01205 | 186707021   | 186707021    | 186707021    | 93881433  | 92825588  | 146779926       | 179383206                 | 7323815    | 8         |
| 20EG01127 | 191909660   | 191909660    | 191909660    | 96601562  | 95308098  | 150243644       | 184133118                 | 7776542    | 8.5       |
| 20EL01751 | 245984537   | 245984537    | 245984537    | 123403082 | 122581455 | 188373502       | 236329004                 | 9655533    | 7.1       |
| 20ES01406 | 215345252   | 215345252    | 215345252    | 107064139 | 108281113 | 169592030       | 204825268                 | 10519984   | 8         |
| 20EZ01759 | 128226406   | 128226406    | 128226406    | 65280228  | 62946178  | 102699332       | 121217062                 | 7009344    | 7.1       |
| 20GC01665 | 186445286   | 186445286    | 186445286    | 93379696  | 93065590  | 152990862       | 180578954                 | 5866332    | 6.4       |
| 20GF01948 | 199830258   | 199830258    | 199830258    | 100760914 | 99069344  | 158973596       | 191771430                 | 8058828    | 7.1       |
| 20GJ01209 | 190205311   | 190205311    | 190205311    | 95717596  | 94487715  | 145185616       | 182373260                 | 7832051    | 7.9       |
| 20GM01331 | 172245683   | 172245683    | 172245683    | 86584994  | 85660689  | 141897226       | 165146956                 | 7098727    | 7.1       |
| 20HW01332 | 170541949   | 170541949    | 170541949    | 86074830  | 84467119  | 134311902       | 164039770                 | 6502179    | 7.5       |
| 20IS01302 | 172532315   | 172532315    | 172532315    | 87108579  | 85423736  | 137629504       | 165858638                 | 6673677    | 7         |
| 20JB01501 | 175402963   | 175402963    | 175402963    | 87978714  | 87424249  | 142310772       | 169169806                 | 6233157    | 8         |
| 20JC01456 | 172304724   | 172304724    | 172304724    | 86599832  | 85704892  | 139160342       | 165683344                 | 6621380    | 7.8       |
| 20JC01720 | 164795115   | 164795115    | 164795115    | 84171889  | 80623226  | 132016724       | 155675132                 | 9119983    | 7.3       |
| 20JD01274 | 167533916   | 167533916    | 167533916    | 84232555  | 83301361  | 116613116       | 160239982                 | 7293934    | 7.6       |
| 20JD01577 | 179834657   | 179834657    | 179834657    | 90200490  | 89634167  | 144328994       | 173213176                 | 6621481    | 8.1       |

---

| Sample    | Total reads | Mapped reads | Paired reads | Read1     | Read2     | Properly paired | Read and mate read mapped | Singletons | RIN score |
|-----------|-------------|--------------|--------------|-----------|-----------|-----------------|---------------------------|------------|-----------|
| 20JG01849 | 173810606   | 173810606    | 173810606    | 87074484  | 86736122  | 140352640       | 168065416                 | 5745190    | 7.5       |
| 20JH01781 | 196189759   | 196189759    | 196189759    | 98256152  | 97933607  | 158182602       | 189880786                 | 6308973    | 7.5       |
| 20JH01887 | 200558313   | 200558313    | 200558313    | 101137497 | 99420816  | 158855108       | 192411166                 | 8147147    | 7.4       |
| 20JM01263 | 179993914   | 179993914    | 179993914    | 90997854  | 88996060  | 143670140       | 172869020                 | 7124894    | 7.8       |
| 20JM01785 | 182769727   | 182769727    | 182769727    | 92685323  | 90084404  | 150904060       | 174529786                 | 8239941    | 7.5       |
| 20JP01292 | 170412553   | 170412553    | 170412553    | 88096074  | 82316479  | 135915466       | 159167392                 | 11245161   | 6.7       |
| 20JR01203 | 176369680   | 176369680    | 176369680    | 90873581  | 85496099  | 136361016       | 165395360                 | 10974320   | 7         |
| 20JT01288 | 178594349   | 178594349    | 178594349    | 89749855  | 88844494  | 144059904       | 171030046                 | 7564303    | 7.4       |
| 20JW01850 | 216689934   | 216689934    | 216689934    | 109275263 | 107414671 | 172753790       | 208495932                 | 8194002    | 7.4       |
| 20KM01480 | 202647510   | 202647510    | 202647510    | 101710291 | 100937219 | 163943930       | 194955058                 | 7692452    | 7.8       |
| 20LB01727 | 150437392   | 150437392    | 150437392    | 75569600  | 74867792  | 120821686       | 145099680                 | 5337712    | 7.3       |
| 20LD01214 | 156555268   | 156555268    | 156555268    | 78946447  | 77608821  | 124545852       | 150477976                 | 6077292    | 8.3       |
| 20LH01824 | 145068059   | 145068059    | 145068059    | 73964139  | 71103920  | 116051326       | 136894514                 | 8173545    | 7.5       |
| 20LO01967 | 160838180   | 160838180    | 160838180    | 82827639  | 78010541  | 129707592       | 150896378                 | 9941802    | 8.4       |
| 20MC01828 | 161029705   | 161029705    | 161029705    | 80864703  | 80165002  | 128690630       | 155131158                 | 5898547    | 8.6       |
| 20MC01968 | 174528630   | 174528630    | 174528630    | 88698635  | 85829995  | 139141434       | 166043188                 | 8485442    | 6.6       |
| 20MD01251 | 129540240   | 129540240    | 129540240    | 65893170  | 63647070  | 101966664       | 121286018                 | 8254222    | 7.4       |
| 20MF01454 | 177636072   | 177636072    | 177636072    | 89562919  | 88073153  | 136882210       | 170258946                 | 7377126    | 7         |
| 20MH01845 | 175144015   | 175144015    | 175144015    | 87935607  | 87208408  | 140326910       | 168796582                 | 6347433    | 7.8       |
| 20MH01879 | 169497141   | 169497141    | 169497141    | 84910043  | 84587098  | 138526598       | 164060784                 | 5436357    | 7.7       |
| 20ML01902 | 170492409   | 170492409    | 170492409    | 85622249  | 84870160  | 134194882       | 165237000                 | 5255409    | 7.7       |
| 20MS01733 | 186401237   | 186401237    | 186401237    | 93598329  | 92802908  | 148735938       | 180808938                 | 5592299    | 7.8       |
| 20MT01164 | 195597610   | 195597610    | 195597610    | 98267597  | 97330013  | 158647406       | 187387094                 | 8210516    | 6.6       |
| 20NB01855 | 126920617   | 126920617    | 126920617    | 69926526  | 56994091  | 92389314        | 110718222                 | 16202395   | 7.4       |
| 20OH01215 | 178082209   | 178082209    | 178082209    | 89465875  | 88616334  | 141751052       | 170616592                 | 7465617    | 7.5       |
| 20PC01455 | 161000846   | 161000846    | 161000846    | 80788239  | 80212607  | 124512706       | 154454824                 | 6546022    | 7.1       |
| 20PD01505 | 169179571   | 169179571    | 169179571    | 84817377  | 84362194  | 134936820       | 162927844                 | 6251727    | 6.5       |
| 20PF01735 | 163653876   | 163653876    | 163653876    | 82176350  | 81477526  | 131559466       | 157946152                 | 5707724    | 8.6       |
| 20PH01298 | 164675618   | 164675618    | 164675618    | 82706826  | 81968792  | 132727060       | 157901546                 | 6774072    | 7.3       |
| 20PL01827 | 211585922   | 211585922    | 211585922    | 106211723 | 105374199 | 172138918       | 205324284                 | 6261638    | 7.7       |
| 20PM01841 | 187918349   | 187918349    | 187918349    | 94336845  | 93581504  | 153878404       | 182277742                 | 5640607    | 7.9       |
| 20PP01831 | 128784054   | 128784054    | 128784054    | 64581776  | 64202278  | 102600462       | 124115564                 | 4668490    | 6.7       |
| 20PR01392 | 196483074   | 196483074    | 196483074    | 98570589  | 97912485  | 158850032       | 188640634                 | 7842440    | 7.9       |
| 20PS01694 | 111226073   | 111226073    | 111226073    | 61098771  | 50127302  | 79441730        | 97202938                  | 14023135   | 7.9       |
| 20PW01714 | 160464655   | 160464655    | 160464655    | 80517957  | 79946698  | 131273960       | 154912498                 | 5552157    | 7.9       |
| 20RB01952 | 90498182    | 90498182     | 90498182     | 50689744  | 39808438  | 64491760        | 77280140                  | 13218042   | 7.4       |
| 20RC01659 | 145767697   | 145767697    | 145767697    | 73051329  | 72716368  | 111687700       | 140569158                 | 5198539    | 7.4       |
| 20RC01868 | 135227258   | 135227258    | 135227258    | 68558981  | 66668277  | 104810232       | 129066582                 | 6160676    | 6.8       |
| 20RD01346 | 191311590   | 191311590    | 191311590    | 96281006  | 95030584  | 147742928       | 183465320                 | 7846270    | 8.4       |
| 20RE01817 | 155433383   | 155433383    | 155433383    | 79216883  | 76216500  | 125495634       | 147544912                 | 7888471    | 7.4       |
| 20RH01884 | 167591408   | 167591408    | 167591408    | 85152959  | 82438449  | 133643316       | 159504340                 | 8087068    | 7.4       |

---

| Sample    | Total reads | Mapped reads | Paired reads | Read1     | Read2     | Properly paired | Read and mate read mapped | Singletons | RIN score |
|-----------|-------------|--------------|--------------|-----------|-----------|-----------------|---------------------------|------------|-----------|
| 20RJ01217 | 179794079   | 179794079    | 179794079    | 90791638  | 89002441  | 143931754       | 172918712                 | 6875367    | 7.5       |
| 20RJ01812 | 163476045   | 163476045    | 163476045    | 81958827  | 81517218  | 129162870       | 157919108                 | 5556937    | 7.9       |
| 20RL01528 | 189430969   | 189430969    | 189430969    | 95067865  | 94363104  | 154844790       | 182893442                 | 6537527    | 7.8       |
| 20RP01386 | 190159011   | 190159011    | 190159011    | 95902134  | 94256877  | 153746580       | 182802816                 | 7356195    | 8.1       |
| 20RP01833 | 176382452   | 176382452    | 176382452    | 88597962  | 87784490  | 143660706       | 171123596                 | 5258856    | 8.1       |
| 20RS01126 | 185723099   | 185723099    | 185723099    | 93525494  | 92197605  | 154628364       | 179863642                 | 5859457    | 6.9       |
| 20RT01367 | 194868463   | 194868463    | 194868463    | 97822626  | 97045837  | 158368176       | 187530410                 | 7338053    | 7.6       |
| 20RV01241 | 194784350   | 194784350    | 194784350    | 98012945  | 96771405  | 158676452       | 188445834                 | 6338516    | 7.9       |
| 20RW01403 | 190074513   | 190074513    | 190074513    | 95915037  | 94159476  | 149880086       | 182428676                 | 7645837    | 7.7       |
| 20RW01823 | 189498928   | 189498928    | 189498928    | 96835431  | 92663497  | 150511212       | 178774446                 | 10724482   | 8         |
| 20SB01532 | 170223713   | 170223713    | 170223713    | 85457330  | 84766383  | 135313570       | 164034516                 | 6189197    | 8.7       |
| 20SC01497 | 152771498   | 152771498    | 152771498    | 76620553  | 76150945  | 118732566       | 146955922                 | 5815576    | 6.9       |
| 20SD01603 | 185330758   | 185330758    | 185330758    | 92957008  | 92373750  | 151887830       | 178775778                 | 6554980    | 7.7       |
| 20SD01837 | 163253539   | 163253539    | 163253539    | 82012940  | 81240599  | 131817618       | 157300490                 | 5953049    | 7.9       |
| 20SE01776 | 152996870   | 152996870    | 152996870    | 77928595  | 75068275  | 123615460       | 144631362                 | 8365508    | 7         |
| 20SF01123 | 187020087   | 187020087    | 187020087    | 94218774  | 92801313  | 150232568       | 180194276                 | 6825811    | 7.8       |
| 20SH01483 | 196122248   | 196122248    | 196122248    | 98358488  | 97763760  | 159588768       | 189215094                 | 6907154    | 7.7       |
| 20SI01410 | 135428800   | 135428800    | 135428800    | 68118937  | 67309863  | 108252478       | 130571570                 | 4857230    | 8         |
| 20SP01339 | 159941841   | 159941841    | 159941841    | 80433925  | 79507916  | 131369164       | 154759624                 | 5182217    | 8         |
| 20SW01296 | 185876783   | 185876783    | 185876783    | 93553637  | 92323146  | 144708110       | 178238384                 | 7638399    | 8         |
| 20TH01341 | 169514270   | 169514270    | 169514270    | 85339134  | 84175136  | 137933734       | 162162798                 | 7351472    | 6.5       |
| 20TU01919 | 220341511   | 220341511    | 220341511    | 111128605 | 109212906 | 175115844       | 212071184                 | 8270327    | 7.1       |
| 20TW01940 | 106409328   | 106409328    | 106409328    | 58844412  | 47564916  | 76611824        | 92316724                  | 14092604   | 7.4       |
| 20WC01228 | 177255825   | 177255825    | 177255825    | 90136315  | 87119510  | 143248554       | 168702642                 | 8553183    | 7.4       |
| CON_573MB | 188346372   | 188346372    | 188346372    | 95236317  | 93110055  | 159140388       | 180842380                 | 7503992    | 7.6       |
| CON_N0762 | 186170619   | 186170619    | 186170619    | 94096774  | 92073845  | 156485076       | 179024238                 | 7146381    | 8.9       |
| CON_N1212 | 168950913   | 168950913    | 168950913    | 77450001  | 91500912  | 125889880       | 148290556                 | 20660357   | 8         |
| CON_N1754 | 170592687   | 170592687    | 170592687    | 86390169  | 84202518  | 146810690       | 163516420                 | 7076267    | 6.7       |
| CON_N1877 | 193857995   | 193857995    | 193857995    | 97943717  | 95914278  | 163150130       | 186894016                 | 6963979    | 6.8       |
| CON_N2658 | 151315293   | 151315293    | 151315293    | 76114705  | 75200588  | 128088146       | 147107788                 | 4207505    | 8.5       |
| CON_N2765 | 181763594   | 181763594    | 181763594    | 91456276  | 90307318  | 153431628       | 176431236                 | 5332358    | 8.6       |
| CON_N2917 | 181244331   | 181244331    | 181244331    | 91154076  | 90090255  | 151277488       | 175892458                 | 5351873    | 8.5       |
| CON_N3060 | 192415201   | 192415201    | 192415201    | 97372263  | 95042938  | 162290476       | 185330638                 | 7084563    | 8.3       |
| CON_N3064 | 106805865   | 106805865    | 106805865    | 53666915  | 53138950  | 90648978        | 104027064                 | 2778801    | 6.8       |
| CON_N3077 | 208529308   | 208529308    | 208529308    | 105500342 | 103028966 | 174772588       | 200104640                 | 8424668    | 8.2       |
| CON_N3145 | 192220064   | 192220064    | 192220064    | 97997343  | 94222721  | 156527256       | 180123730                 | 12096334   | 7.4       |
| CON_N3683 | 195731390   | 195731390    | 195731390    | 98998814  | 96732576  | 163425174       | 188750124                 | 6981266    | 8.2       |
| CON_N3736 | 191220571   | 191220571    | 191220571    | 96734755  | 94485816  | 157482322       | 184100058                 | 7120513    | 8.3       |
| CON_N3878 | 185366142   | 185366142    | 185366142    | 94243217  | 91122925  | 150932546       | 176689264                 | 8676878    | 8.9       |
| CON_N4856 | 212708991   | 212708991    | 212708991    | 107549243 | 105159748 | 180349820       | 204306902                 | 8402089    | 7.7       |
| CON_N5288 | 170677602   | 170677602    | 170677602    | 86303527  | 84374075  | 145745272       | 163989956                 | 6687646    | 6.5       |

| Sample    | Total reads | Mapped reads | Paired reads | Read1     | Read2     | Properly paired | Read and mate read mapped | Singletons | RIN score |
|-----------|-------------|--------------|--------------|-----------|-----------|-----------------|---------------------------|------------|-----------|
| CON_N5713 | 221456360   | 221456360    | 221456360    | 111972170 | 109484190 | 187944032       | 212921308                 | 8535052    | 7.5       |
| CON_N7990 | 181892765   | 181892765    | 181892765    | 91687543  | 90205222  | 150837348       | 176287542                 | 5605223    | 8.4       |
| CON_N8073 | 146884806   | 146884806    | 146884806    | 73896217  | 72988589  | 123006116       | 142762310                 | 4122496    | 8         |
| CON_N9303 | 152976339   | 152976339    | 152976339    | 77052703  | 75923636  | 122642922       | 147829644                 | 5146695    | 8.9       |
| CON_N9356 | 162613915   | 162613915    | 162613915    | 81968741  | 80645174  | 138484338       | 157470620                 | 5143295    | 8.1       |
| CON_N9511 | 188445104   | 188445104    | 188445104    | 94887967  | 93557137  | 161935914       | 182992360                 | 5452744    | 7.2       |
| CON__259M | 147708367   | 147708367    | 147708367    | 74453615  | 73254752  | 123961880       | 143188742                 | 4519625    | 7.4       |
| CON__3083 | 216578226   | 216578226    | 216578226    | 112248954 | 104329272 | 169618498       | 194033078                 | 22545148   | 8.9       |
| CON__3091 | 177434912   | 177434912    | 177434912    | 91746000  | 85688912  | 137878054       | 160002996                 | 17431916   | 8.8       |
| CON__3108 | 178879493   | 178879493    | 178879493    | 90124413  | 88755080  | 142302572       | 172678072                 | 6201421    | 10        |
| CON__3112 | 192365259   | 192365259    | 192365259    | 88676928  | 103688331 | 145894040       | 170562160                 | 21803099   | 9.7       |
| CON__3160 | 179770725   | 179770725    | 179770725    | 84830637  | 94940088  | 132335284       | 154514092                 | 25256633   | 8.6       |
| CON__4043 | 195585881   | 195585881    | 195585881    | 101421298 | 94164583  | 149599902       | 175361812                 | 20224069   | 8.6       |
| CON__4062 | 175885753   | 175885753    | 175885753    | 80519245  | 95366508  | 131608534       | 154904158                 | 20981595   | 8.1       |
| CON__4184 | 195865392   | 195865392    | 195865392    | 98679783  | 97185609  | 158654990       | 189291296                 | 6574096    | 8.1       |
| CON__429M | 205871375   | 205871375    | 205871375    | 104121515 | 101749860 | 170088438       | 197702244                 | 8169131    | 7.3       |
| CON__455M | 208643107   | 208643107    | 208643107    | 105058696 | 103584411 | 174663080       | 202375572                 | 6267535    | 7.5       |
| CON__461M | 194386324   | 194386324    | 194386324    | 98405447  | 95980877  | 159801626       | 186497210                 | 7889114    | 7.9       |
| CON__475M | 168678495   | 168678495    | 168678495    | 84957349  | 83721146  | 143704220       | 163656746                 | 5021749    | 7.1       |
| CON__5033 | 166709005   | 166709005    | 166709005    | 84263136  | 82445869  | 138615614       | 160330504                 | 6378501    | 8.7       |
| CON__5126 | 202136478   | 202136478    | 202136478    | 93306968  | 108829510 | 152240514       | 179425374                 | 22711104   | 8.3       |
| CON__5138 | 201030171   | 201030171    | 201030171    | 101221834 | 99808337  | 173063352       | 195553736                 | 5476435    | 8.3       |
| CON__5140 | 183808767   | 183808767    | 183808767    | 84785996  | 99022771  | 138589518       | 163225290                 | 20583477   | 9.5       |
| CON__6008 | 168213892   | 168213892    | 168213892    | 78826501  | 89387391  | 123668744       | 143490038                 | 24723854   | 8.5       |
| CON__6028 | 217679383   | 217679383    | 217679383    | 110693076 | 106986307 | 179866798       | 207413188                 | 10266195   | 8.1       |
| CON__6092 | 176908405   | 176908405    | 176908405    | 89347272  | 87561133  | 140283484       | 170598204                 | 6310201    | 9         |
| CON__643M | 206512172   | 206512172    | 206512172    | 104442152 | 102070020 | 172007916       | 198584580                 | 7927592    | 6.8       |
| CON__669M | 158844497   | 158844497    | 158844497    | 79949769  | 78894728  | 134712280       | 154059914                 | 4784583    | 7.3       |
| CON__7024 | 185193886   | 185193886    | 185193886    | 85025268  | 100168618 | 139817268       | 162761696                 | 22432190   | 9         |
| CON__7040 | 180953678   | 180953678    | 180953678    | 83186404  | 97767274  | 134848890       | 159238680                 | 21714998   | 9         |
| CON__7054 | 184482642   | 184482642    | 184482642    | 87100312  | 97382330  | 137998910       | 158415632                 | 26067010   | 8.8       |
| CON__7060 | 142106477   | 142106477    | 142106477    | 65976510  | 76129967  | 106351256       | 126770932                 | 15335545   | 8.9       |
| CON__711M | 181607648   | 181607648    | 181607648    | 94088368  | 87519280  | 142182202       | 162856398                 | 18751250   | 8.3       |
| CON__713M | 208714066   | 208714066    | 208714066    | 106099229 | 102614837 | 172937456       | 199165274                 | 9548792    | 7.5       |
| CON__827M | 138483817   | 138483817    | 138483817    | 69992062  | 68491755  | 116653374       | 133120864                 | 5362953    | 7.3       |
| CON__843M | 159042973   | 159042973    | 159042973    | 80059961  | 78983012  | 132098370       | 154293244                 | 4749729    | 6.6       |
| CON__916M | 231861837   | 231861837    | 231861837    | 117370043 | 114491794 | 193783348       | 222657954                 | 9203883    | 7.5       |
| CON__H73B | 200768992   | 200768992    | 200768992    | 101549970 | 99219022  | 170120952       | 193436974                 | 7332018    | 9         |
| CON__H12  | 174193677   | 174193677    | 174193677    | 90173471  | 84020206  | 139494576       | 156377402                 | 17816275   | 6.8       |
| CON__H13  | 162117814   | 162117814    | 162117814    | 74540736  | 87577078  | 121618836       | 142455416                 | 19662398   | 8.4       |
| CON__H14  | 147258329   | 147258329    | 147258329    | 68233547  | 79024782  | 111598008       | 131346296                 | 15912033   | 7         |

| Sample   | Total reads | Mapped reads | Paired reads | Read1     | Read2     | Properly paired | Read and mate read mapped | Singletons | RIN score |
|----------|-------------|--------------|--------------|-----------|-----------|-----------------|---------------------------|------------|-----------|
| CON__H20 | 168245443   | 168245443    | 168245443    | 85793293  | 82452150  | 139232456       | 157422100                 | 10823343   | 6.6       |
| CON__H22 | 224657141   | 224657141    | 224657141    | 114625290 | 110031851 | 184287914       | 210242316                 | 14414825   | 7.1       |
| CON__H24 | 208963895   | 208963895    | 208963895    | 106648098 | 102315797 | 172226312       | 195552794                 | 13411101   | 7.8       |
| CON__H25 | 185809211   | 185809211    | 185809211    | 94769684  | 91039527  | 151063480       | 173663664                 | 12145547   | 8.1       |
| CON__H26 | 167006679   | 167006679    | 167006679    | 84101255  | 82905424  | 146363448       | 162269748                 | 4736931    | 7.1       |
| CON__H27 | 182676401   | 182676401    | 182676401    | 92379468  | 90296933  | 152928932       | 176195170                 | 6481231    | 8.2       |
| CON__H28 | 190948945   | 190948945    | 190948945    | 97464398  | 93484547  | 155774092       | 178530186                 | 12418759   | 8         |
| CON__H29 | 188291366   | 188291366    | 188291366    | 86047090  | 102244276 | 142686664       | 165411964                 | 22879402   | 8.3       |
| CON__H30 | 157441594   | 157441594    | 157441594    | 79556704  | 77884890  | 126123048       | 147297618                 | 10143976   | 7.1       |
| CON__H31 | 167027485   | 167027485    | 167027485    | 84071767  | 82955718  | 144493188       | 162530208                 | 4497277    | 6.7       |
| CON__H35 | 191471523   | 191471523    | 191471523    | 87714965  | 103756558 | 143172178       | 168713656                 | 22757867   | 7.6       |
| CON__H36 | 177163669   | 177163669    | 177163669    | 86599861  | 90563808  | 137618076       | 166111224                 | 11052445   | 8.5       |
| CON__H38 | 227239474   | 227239474    | 227239474    | 114608363 | 112631111 | 183953502       | 219237044                 | 8002430    | 8.7       |
| CON__H39 | 204376079   | 204376079    | 204376079    | 99942262  | 104433817 | 161341600       | 191527934                 | 12848145   | 8.7       |
| CON__H40 | 205595443   | 205595443    | 205595443    | 106583546 | 99011897  | 159089474       | 184402626                 | 21192817   | 9         |
| CON__H42 | 205392775   | 205392775    | 205392775    | 103467813 | 101924962 | 169518286       | 198419408                 | 6973367    | 8.5       |
| CON__H44 | 188143436   | 188143436    | 188143436    | 86548240  | 101595196 | 142432104       | 166482410                 | 21661026   | 8.9       |
| CON__H46 | 171677780   | 171677780    | 171677780    | 78738803  | 92938977  | 128469226       | 150811092                 | 20866688   | 8.1       |
| CON__H47 | 182537179   | 182537179    | 182537179    | 83452439  | 99084740  | 132764016       | 159675828                 | 22861351   | 8.5       |
| CON__H48 | 153991381   | 153991381    | 153991381    | 79661877  | 74329504  | 118452456       | 138688764                 | 15302617   | 8.7       |
| CON__H49 | 203051355   | 203051355    | 203051355    | 102335713 | 100715642 | 164845396       | 196056910                 | 6994445    | 8.5       |
| CON__H50 | 229271024   | 229271024    | 229271024    | 115921676 | 113349348 | 192920970       | 221222034                 | 8048990    | 8.6       |
| CON__H54 | 215576844   | 215576844    | 215576844    | 105467815 | 110109029 | 174018658       | 202274682                 | 13302162   | 8.7       |
| CON__H59 | 214501689   | 214501689    | 214501689    | 108150516 | 106351173 | 177675972       | 207317210                 | 7184479    | 9.2       |
| CON__H61 | 180423698   | 180423698    | 180423698    | 82416380  | 98007318  | 135681754       | 158381160                 | 22042538   | 8.9       |
| CON__H65 | 224050419   | 224050419    | 224050419    | 116131753 | 107918666 | 174530470       | 200790272                 | 23260147   | 9.2       |
| CON__H66 | 230951154   | 230951154    | 230951154    | 116803751 | 114147403 | 180611658       | 215828512                 | 15122642   | 9.6       |
| CON__H68 | 166347409   | 166347409    | 166347409    | 84046551  | 82300858  | 138903834       | 160115974                 | 6231435    | 8.6       |
| CON__H69 | 199448940   | 199448940    | 199448940    | 100493367 | 98955573  | 162987338       | 192795844                 | 6653096    | 8.6       |
| CON__H70 | 188034445   | 188034445    | 188034445    | 88583858  | 99450587  | 138719078       | 161320648                 | 26713797   | 9.1       |
| CON__H71 | 225347465   | 225347465    | 225347465    | 113489834 | 111857631 | 184801972       | 217939002                 | 7408463    | 9.3       |
| CON__H76 | 202829901   | 202829901    | 202829901    | 105054866 | 97775035  | 155336116       | 182295694                 | 20534207   | 8.5       |
| CON__H77 | 178286435   | 178286435    | 178286435    | 92387119  | 85899316  | 135768406       | 159347650                 | 18938785   | 8.4       |
| CON__H78 | 175178226   | 175178226    | 175178226    | 88403343  | 86774883  | 137098112       | 168919782                 | 6258444    | 9.6       |
| CON__H79 | 212028472   | 212028472    | 212028472    | 106839749 | 105188723 | 172259552       | 204768990                 | 7259482    | 9.6       |
| CON__H80 | 174456531   | 174456531    | 174456531    | 85283211  | 89173320  | 135609194       | 163232230                 | 11224301   | 8.9       |
| CON__H81 | 169770791   | 169770791    | 169770791    | 88088011  | 81682780  | 128278010       | 151840732                 | 17930059   | 9.3       |
| CON__H82 | 204246163   | 204246163    | 204246163    | 102866181 | 101379982 | 165671366       | 197668648                 | 6577515    | 8.5       |
| CON__H84 | 155937321   | 155937321    | 155937321    | 78535477  | 77401844  | 127616376       | 150692382                 | 5244939    | 9         |
| CON__H85 | 151251654   | 151251654    | 151251654    | 74021989  | 77229665  | 116259548       | 141815682                 | 9435972    | 9         |
| CON__H86 | 151501090   | 151501090    | 151501090    | 69350273  | 82150817  | 112228464       | 133297612                 | 18203478   | 8.7       |

---

| <b>Sample</b> | <b>Total reads</b> | <b>Mapped reads</b> | <b>Paired reads</b> | <b>Read1</b> | <b>Read2</b> | <b>Properly paired</b> | <b>Read and mate read mapped</b> | <b>Singletons</b> | <b>RIN score</b> |
|---------------|--------------------|---------------------|---------------------|--------------|--------------|------------------------|----------------------------------|-------------------|------------------|
| CON__LV4      | 212249347          | 212249347           | 212249347           | 103685899    | 108563448    | 164249852              | 198850032                        | 13399315          | 7.9              |
| CON__10       | 165224312          | 165224312           | 165224312           | 84143373     | 81080939     | 134874444              | 153342958                        | 11881354          | 7.8              |
| CON__14       | 154297575          | 154297575           | 154297575           | 77980365     | 76317210     | 129583206              | 148431980                        | 5865595           | 7                |
| CON__23       | 178780234          | 178780234           | 178780234           | 90939069     | 87841165     | 147520484              | 170481524                        | 8298710           | 7.4              |
| CON__29       | 187896445          | 187896445           | 187896445           | 95092666     | 92803779     | 156315350              | 180685022                        | 7211423           | 7.6              |
| CON__H3       | 162681274          | 162681274           | 162681274           | 74613659     | 88067615     | 123422008              | 143583114                        | 19098160          | 8.2              |
| CON__H6       | 169830397          | 169830397           | 169830397           | 85630677     | 84199720     | 137375826              | 164287748                        | 5542649           | 7.5              |
| CON__H8       | 153337986          | 153337986           | 153337986           | 72199881     | 81138105     | 114448420              | 131643306                        | 21694680          | 7.6              |
| CON__H9       | 134748477          | 134748477           | 134748477           | 63497017     | 71251460     | 100777542              | 115491248                        | 19257229          | 7.8              |

**Supplemental table 6:** *DCM associated genes from Roberts et al. (2015) [20].*

---

|         |        |        |       |
|---------|--------|--------|-------|
| ACTC1   | EMD    | LDB3   | SGCA  |
| ACTN2   | EYA4   | LMNA   | SGCB  |
| ALMS1   | FHL2   | MYBPC3 | SGCD  |
| ANKRD1  | FKRP   | MYH6   | SGCG  |
| APOA1   | FKTN   | MYH7   | SOD2  |
| BAG3    | FLT1   | NEXN   | SYNE1 |
| CAV3    | FOXD4  | NFKB1  | TAZ   |
| CRYAB   | FXN    | PDLIM3 | TBX20 |
| CSRP3   | GATAD1 | PLEC   | TCAP  |
| CTF1    | HADHA  | PLN    | TMPO  |
| DES     | HFE    | PRDM16 | TNNC1 |
| DMD     | HOPX   | PSEN1  | TNNI3 |
| DNAJC19 | ILK    | PSEN2  | TNNT2 |
| DSG2    | LAMA2  | RBM20  | TPM1  |
| DSP     | LAMA4  | SCN5A  | TTN   |
| DTNA    | LAMP2  | SDHA   | VCL   |

---

**Supplemental table 7:** *Genotype accuracy based on variant positions with high coverage (>30 reads) RNA-seq data.*

|                        | DCM   | Donors |
|------------------------|-------|--------|
| Accuracy               | 98.0% | 98.9%  |
| Accuracy homozygous    | 98.9% | 99.5%  |
| Non reference accuracy | 95.9% | 96.9%  |



**Supplemental Table 8:** Summary of the comparison of eQTL results with the GTEx study. Details for eQTL from the full sample (current study)

as well as eQTL from only the DCM patients or only the donor samples are given.

| Primary study<br>Secondary Study                         | Current study | GTEx_v6       | DCM cases | GTEx_v6   | Donors  | GTEx_v6 |
|----------------------------------------------------------|---------------|---------------|-----------|-----------|---------|---------|
|                                                          | GTEx_v6       | Current study | GTEx_v6   | DCM cases | GTEx_v6 | Donors  |
| eGenes in primary study                                  | 5074          | 4526          | 2635      | 4526      | 2239    | 4526    |
| eGenes with SNPs analysed in secondary study             | 4153          | 797           | 2198      | 797       | 1822    | 797     |
| fraction of eGenes with SNPs analysed in secondary study | 0.82          | 0.18          | 0.83      | 0.18      | 0.81    | 0.18    |
| concordant eQTLs                                         | 4042          | 774           | 2141      | 764       | 1788    | 770     |
| fraction concordant eQTLs                                | 0.97          | 0.97          | 0.97      | 0.96      | 0.98    | 0.97    |
| significant eQTLs in both                                | 1659          | 577           | 1204      | 376       | 1090    | 346     |
| fraction significant eQTLs in both                       | 0.40          | 0.72          | 0.55      | 0.47      | 0.60    | 0.43    |
| q-value analysis $\pi_0$                                 | 0.06          | 0.08          | 0.05      | 0.16      | 0.08    | 0.10    |

**Supplemental Table 9: Gene ontology enrichment analysis results for genes at ASE sites with significant differences between DCM and Donor samples, and with a preferential allele.**

| Category                                  | Term                                              | Enrichment p-value |
|-------------------------------------------|---------------------------------------------------|--------------------|
| BP                                        | heart development                                 | 2.70E-04           |
|                                           | regulation of skeletal muscle cell proliferation  | 4.00E-04           |
|                                           | system process                                    | 1.10E-03           |
|                                           | cardiac cell development                          | 1.35E-03           |
|                                           | muscle structure development                      | 1.51E-03           |
|                                           | tissue development                                | 3.34E-03           |
|                                           | regulation of integrin-mediated signaling pathway | 3.91E-03           |
|                                           | negative regulation of MAPK cascade               | 4.07E-03           |
|                                           | regulation of necroptotic process                 | 4.72E-03           |
|                                           | organelle assembly                                | 4.82E-03           |
|                                           | developmental growth                              | 5.10E-03           |
|                                           | lipid particle organization                       | 5.94E-03           |
|                                           | nucleoside diphosphate metabolic process          | 6.02E-03           |
|                                           | muscle cell development                           | 6.20E-03           |
|                                           | organic substance catabolic process               | 6.65E-03           |
|                                           | necrotic cell death                               | 6.98E-03           |
|                                           | mitochondrial fission                             | 7.54E-03           |
|                                           | regulation of blood pressure                      | 7.78E-03           |
|                                           | respiratory gaseous exchange                      | 7.80E-03           |
|                                           | ncRNA 3'-end processing                           | 8.86E-03           |
| early endosome to late endosome transport | 9.11E-03                                          |                    |
| actin cytoskeleton organization           | 9.75E-03                                          |                    |
| CC                                        | cytoplasmic part                                  | 2.10E-04           |
|                                           | intrinsic component of organelle membrane         | 5.30E-04           |
|                                           | cytoplasm                                         | 1.46E-03           |
|                                           | endosomal part                                    | 1.54E-03           |
|                                           | extracellular membrane-bounded organelle          | 1.61E-03           |
|                                           | organelle                                         | 1.97E-03           |
|                                           | extracellular organelle                           | 2.07E-03           |
|                                           | vesicle                                           | 2.34E-03           |
|                                           | contractile fiber part                            | 2.84E-03           |
|                                           | nuclear membrane part                             | 5.17E-03           |
|                                           | membrane-bounded vesicle                          | 5.22E-03           |
|                                           | actin cytoskeleton                                | 5.49E-03           |
|                                           | contractile fiber                                 | 5.78E-03           |
|                                           | endosome                                          | 5.87E-03           |
|                                           | endosome membrane                                 | 6.33E-03           |
|                                           | cell-cell junction                                | 6.94E-03           |
|                                           | extracellular vesicle                             | 7.41E-03           |

**Supplemental Table 9 continued**

| <b>Category</b> | <b>Term</b>                                                  | <b>Enrichment<br/>p-value</b> |
|-----------------|--------------------------------------------------------------|-------------------------------|
| MF              | protein self-association                                     | 4.90E-03                      |
|                 | electron carrier activity                                    | 1.01E-02                      |
|                 | MAP kinase phosphatase activity                              | 1.35E-02                      |
|                 | GDP binding                                                  | 1.55E-02                      |
|                 | solute:cation antiporter activity                            | 1.87E-02                      |
|                 | laminin binding                                              | 2.26E-02                      |
|                 | molecular function regulator                                 | 2.36E-02                      |
|                 | catalytic activity                                           | 2.41E-02                      |
|                 | copper ion binding                                           | 2.67E-02                      |
|                 | cytoskeletal protein binding                                 | 2.68E-02                      |
|                 | fatty acid binding                                           | 3.05E-02                      |
|                 | heme-copper terminal oxidase activity                        | 3.56E-02                      |
|                 | oxidoreductase activity, acting on a heme group of<br>donors | 3.88E-02                      |
|                 | organic acid binding                                         | 4.08E-02                      |
|                 | enzyme activator activity                                    | 4.81E-02                      |
|                 | protein kinase A binding                                     | 4.89E-02                      |
|                 | extracellular matrix binding                                 | 4.95E-02                      |
|                 | structural constituent of muscle                             | 4.95E-02                      |
